# Supplementary material for: The Third Signal Cytokine IL-12 Rescues the Anti-Viral Function of Exhausted HBV-Specific CD8 T Cells
Source: PubMed Central journal article supplement (PMC3597507; doi:10.1371/journal.ppat.1003208), 2013-03-14
Supplement: ppat.1003208.s008.pdf [file ppat.1003208.s008.pdf]

Supplementary Table 1

| Patient | VL before treatment | VL on treatment | Treatment duration | Patient age | Treatment               | HBeAg status |
|---------|---------------------|-----------------|--------------------|-------------|-------------------------|--------------|
| 1       | 4,000,000           | 63,000          | 5 month            | 28          | Entecavir               | Positive     |
| 2       | 828,700             | 40              | 3 month            | 34          | Entecavir               | Negative     |
| 3       | 5,501,500           | 132,500         | 1 month            | 67          | Entecavir               | Negative     |
| 4       | 32,000              | 332             | 7 month            | 57          | Lamivudine<br>+Adefovir | Positive     |
